# Supplementary material for: Selective hydrogenation of CO2gas to formic acid over nanostructured Ru-TiO2catalysts
Source: Royal Society of Chemistry journal article supplement (doi:10.1039/c6ra03660k), 2016-01-01

## Selective hydrogenation of CO<sub>2</sub> gas to formic acid over nanostructured Ru-TiO<sub>2</sub> catalysts

Praveenkumar Ramprakash Upadhyay, Vivek Srivastava\*

Basic Sciences: Chemistry, NIIT University, NH-8 Jaipur/Delhi Highway, Neemrana (Rajasthan) Pin Code:  
301705, Contact Number: +911494302423, email id: [vivek.shrivastava@niituniversity.in](mailto:vivek.shrivastava@niituniversity.in)

### SUPPORTING INFORMATION

#### CO<sub>2</sub> loading on Ionic liquids [1-3]

In a typical procedure, the CO<sub>2</sub> capture was carried out in high pressure autoclave (100 mL). The absorbents were charged into the reactor at room temperature. Then, the air in the flask was replaced by passing CO<sub>2</sub>. The absorption was conducted at 80°C with a 4 bar CO<sub>2</sub> gas for 1 hour. The amount of CO<sub>2</sub> absorbed was determined by calculating the weight of the reaction mixture with an analytical balance. Data points were taken with an accuracy of ±0.0001 g every five minutes. At 80°C slight while at 100°C complete desorption of CO<sub>2</sub> was recorded.

Table 4: Absorption study of CO<sub>2</sub> over ionic liquids

| Ionic liquid                                                                             | CO <sub>2</sub> pressure (bar) | Temperature (°C) | Time (h) | CO <sub>2</sub> Loading <sup>1</sup> |
|------------------------------------------------------------------------------------------|--------------------------------|------------------|----------|--------------------------------------|
| [mammim][NTf <sub>2</sub> ]                                                              | 20                             | 80               | 1        | 25                                   |
| [mammim][TfO]                                                                            | 20                             | 80               | 1        | 41                                   |
| [mammim]                                                                                 | 20                             | 80               | 1        | 47                                   |
| [CF <sub>3</sub> CF <sub>2</sub> CF <sub>2</sub> CF <sub>2</sub> SO <sub>3</sub> ]       |                                |                  | 1        |                                      |
| [mammim] [BF <sub>4</sub> ]                                                              | 20                             | 80               | 1        | 13                                   |
| [DAMI][TfO]                                                                              | 20                             | 80               | 1        | 51                                   |
| [DAMI][NTf <sub>2</sub> ]                                                                | 20                             | 80               | 1        | 48                                   |
| [DAMI][CF <sub>3</sub> CF <sub>2</sub> CF <sub>2</sub> CF <sub>2</sub> SO <sub>3</sub> ] | 20                             | 80               | 1        | 68                                   |
| [DAMI][BF <sub>4</sub> ]                                                                 | 20                             | 80               | 1        | 21                                   |
| [DAMI][CF <sub>3</sub> CF <sub>2</sub> CF <sub>2</sub> CF <sub>2</sub> SO <sub>3</sub> ] | 10                             | 80               | 1        | 31                                   |
| [DAMI][CF <sub>3</sub> CF <sub>2</sub> CF <sub>2</sub> CF <sub>2</sub> SO <sub>3</sub> ] | 25                             | 80               | 1        | 70                                   |
| [DAMI][CF <sub>3</sub> CF <sub>2</sub> CF <sub>2</sub> CF <sub>2</sub> SO <sub>3</sub> ] | 20                             | 50               | 1        | 65                                   |
| [DAMI][CF <sub>3</sub> CF <sub>2</sub> CF <sub>2</sub> CF <sub>2</sub> SO <sub>3</sub> ] | 20                             | 100              | 1        | 35                                   |
| [DAMI][CF <sub>3</sub> CF <sub>2</sub> CF <sub>2</sub> CF <sub>2</sub> SO <sub>3</sub> ] | 20                             | 80               | 3        | 69                                   |
| [DAMI][CF <sub>3</sub> CF <sub>2</sub> CF <sub>2</sub> CF <sub>2</sub> SO <sub>3</sub> ] | 20                             | 80               | 0.5      | 23                                   |

1. Moles of CO<sub>2</sub> captured per mole of ionic liquid

#### References:

1. Rahmana M H, Siajb M, Larachi F 2010 Chemical Engineering and Processing: Process Intensification 49 313.
2. Calleja E T, Skinner J, Tauste D G (2013) Journal of Chemistry 2013 1.
3. Yang Z-Z, He L-N (2014) Beilstein J. Org. Chem. 10 1959.

## Analytical data of functionalized ionic liquids

### [mammim][NTf<sub>2</sub>]

<sup>1</sup>H NMR (400MHz, CDCl<sub>3</sub>): δ 2.17 (s, 6H), δ 2.52 (s, 3H), δ 2.71 (t, 2H), δ 3.59 (s, 3H), δ 4.17 (t, 2H), δ 7.25 (d, 1H), δ 7.28 (d, 1H). Positive ion HRMS (EI) m/z found: 426.2256 (calculated for C<sub>17</sub>H<sub>37</sub>N<sub>4</sub>O<sub>4</sub>S<sub>2</sub>, M<sup>+</sup> requires: 426.2289).

### [mammim] [CF<sub>3</sub>CF<sub>2</sub>CF<sub>2</sub>CF<sub>2</sub>SO<sub>3</sub>]

<sup>1</sup>H NMR (400MHz, MeOD): δ 2.15 (s, 6H), δ 2.55 (s, 3H), δ 2.31 (t, 2H), δ 3.62 (s, 3H), δ 4.19 (t, 2H), δ 7.23 (d, 1H), δ 7.30 (d, 1H). Positive ion HRMS (EI) m/z found: 468.1003 (calculated for C<sub>13</sub>H<sub>19</sub>F<sub>9</sub>N<sub>3</sub>O<sub>3</sub>S, M<sup>+</sup> requires: 468.1002).

### [mammim] [BF<sub>4</sub>]

<sup>1</sup>H NMR (400MHz, CDCl<sub>3</sub>): δ 2.11 (s, 6H), δ 2.45 (s, 3H), δ 2.37 (t, 2H), δ 3.65 (s, 3H), δ 4.22 (t, 2H), δ 7.28 (d, 1H), δ 7.35 (d, 1H). Positive ion HRMS (EI) m/z found: 265.1504 (calculated for C<sub>9</sub>H<sub>19</sub>BF<sub>4</sub>N<sub>3</sub>, M<sup>+</sup> requires: 256.1608).

### [DAMI][CF<sub>3</sub>CF<sub>2</sub>CF<sub>2</sub>CF<sub>2</sub>SO<sub>3</sub>]

<sup>1</sup>H NMR (400 MHz, MeOD): d=2.58 (s, 12H), 2.82 (s, 3H), 2.89 (t, 4H), 4.49 (s, 4H), 7.71 ppm (d, 2H). Positive ion HRMS (EI) m/z found: 313.1663 (calculated for C<sub>12</sub>H<sub>26</sub>BF<sub>4</sub>N<sub>4</sub>, M<sup>+</sup> requires: 313.2181).

### [DAMI] [BF<sub>4</sub>]

<sup>1</sup>H NMR (400 MHz, CDCl<sub>3</sub>): d=2.48 (s, 12H), 2.79 (s, 3H), 2.85 (t, 4H), 4.42 (s, 4H), 7.70 ppm (d, 2H). Positive ion HRMS (EI) m/z found: 525.1542 (calculated for C<sub>16</sub>H<sub>26</sub>F<sub>9</sub>O<sub>3</sub>S, M<sup>+</sup> requires: 525.1580).

### Catalyst poisoning experiments [1-3]

The mercury test has been widely applied to recognize the presence of heterogeneous catalysts as they have ability to poison metal (0) heterogeneous catalysts followed by formation of amalgam or adsorption on the metal surface. Mercury (0) is undoubtedly the most significant way of metal poisoning that form an amalgam. 5 equiv. Hg (0) was added before adding the reactants (CO<sub>2</sub> and H<sub>2</sub> gas) to the reaction mass (Table 6, entry-1 reaction condition was applied). The TON values of formic acid were reduced up to 28.5% (Table 2, entries 1) while no formic acid was formed, when we doubled the amount of Hg (0), the CO<sub>2</sub> hydrogenation reaction was completely inhibited (Table 2, entries 1 and 2). Since mercury has been testified to infrequently encourage the side reactions, the outcomes of the investigations are not always conclusive enough to know the catalyst nature. Therefore, to support our obtained results with Hg (0), we performed the second poisoning test with triphenyl phosphine (PPh<sub>3</sub>) as they have a strong affinity to metal centers. If a catalyst is poisoned totally with <1 equiv. of PPh<sub>3</sub>, such observation indicates the existence of a heterogeneous catalyst. The metal poisoning results with PPh<sub>3</sub> were summarized in table 2, entry 3 and 4. We observed that CO<sub>2</sub> hydrogenation reaction was completely inhibited either by stoichiometric or sub-stoichiometric quantity of PPh<sub>3</sub> (Table 2, entries 3-4).

| Entry | Catalyst              | Poison           | Poison/ catalyst ratio (in equivalents) | TONx10 <sup>2</sup> (mol <sub>FA</sub> /mol <sub>Ru</sub> ) |
|-------|-----------------------|------------------|-----------------------------------------|-------------------------------------------------------------|
| 1     | 1-Ru-TiO <sub>2</sub> | Hg               | 5:1                                     | 38.1                                                        |
| 2     | 1-Ru-TiO <sub>2</sub> | Hg               | 10:1                                    | 0                                                           |
| 3     | 1-Ru-TiO <sub>2</sub> | PPh <sub>3</sub> | 1:1                                     | 0                                                           |
| 4     | 1-Ru-TiO <sub>2</sub> | PPh <sub>3</sub> | 0.5:1                                   | 0                                                           |

### Reference:

1. J.A. Widegren, R.G. Finke, J. Mol. Catal. A: Chem., 2003, 198, 317–341.
2. N.T.S. Phan, M. Van der Sluys, C.W. Jones, Adv. Synth. Catal., 2006, 348, 609–679.
3. Y. Lin, R. G. Finke, Inorg. Chem. 1994, 33, 4891 – 4910.

### **Filtration Test [1-3]**

This test was performed for a comparison of the catalytic activity of 1-Ru-TiO<sub>2</sub> catalysts before and after filtering the active catalyst solution. In this study, the 1-Ru-TiO<sub>2</sub> catalyst was mixed with hydrogen gas (Table 6, entry-1 reaction condition was applied). The solid was separated from the solution by using a 0.45 mm polytetrafluoroethylene (PTFE) filter and the filtrate was used for the hydrogenation reaction. No formic acid formation was confirmed negligible amount of active Ru metal catalyst leaching from the 1-Ru-TiO<sub>2</sub> catalyst. This result was also supported by ICP-OES analysis result of filtrate where Ru metal was not detected in the solution.

### **Reference:**

1. A.V. Gaikwad, A. Holuigue, M.B. Thathagar, J.E. ten Elshof, G. Rothenberg, *Chem. Eur. J.*, 2007, 6908–6913.
2. Z. Xu, N. D. McNamara, G. T. Neumann, W. F. Schneider, J. C. Hicks, *ChemCatChem*, 2013, 5, 1769 – 1771.
3. J.A. Widegren, R.G. Finke, *J. Mol. Catal. A: Chem.*, 2003, 198, 317–341.

## Histogram Data

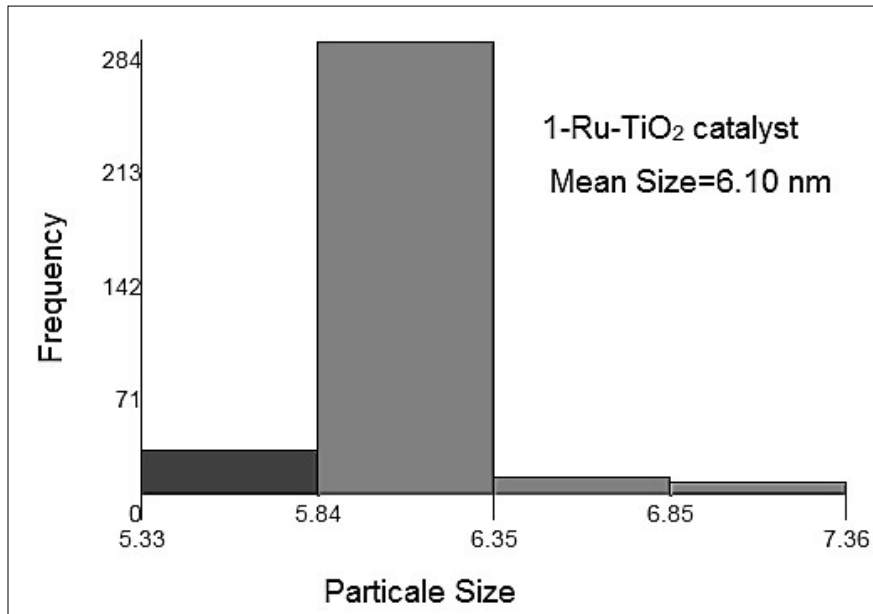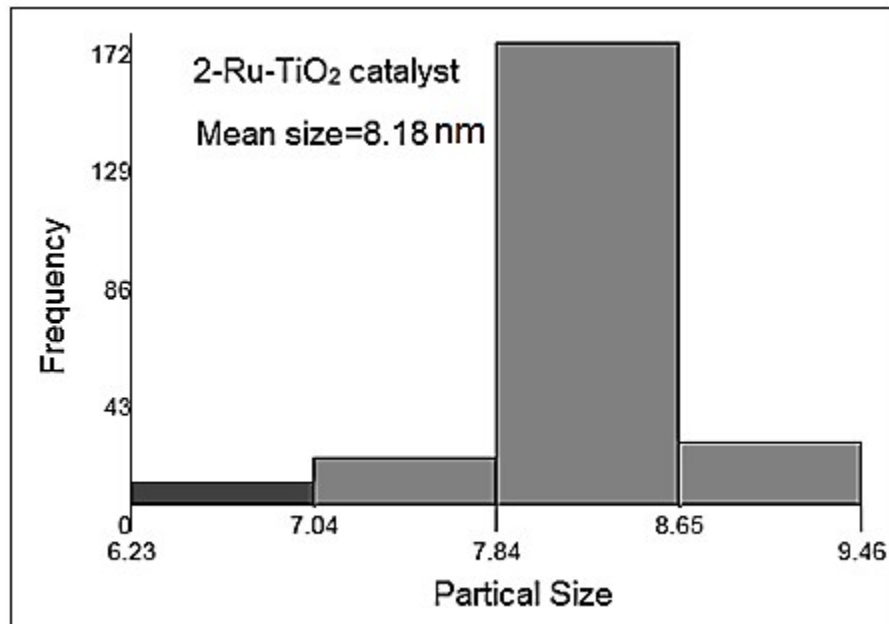

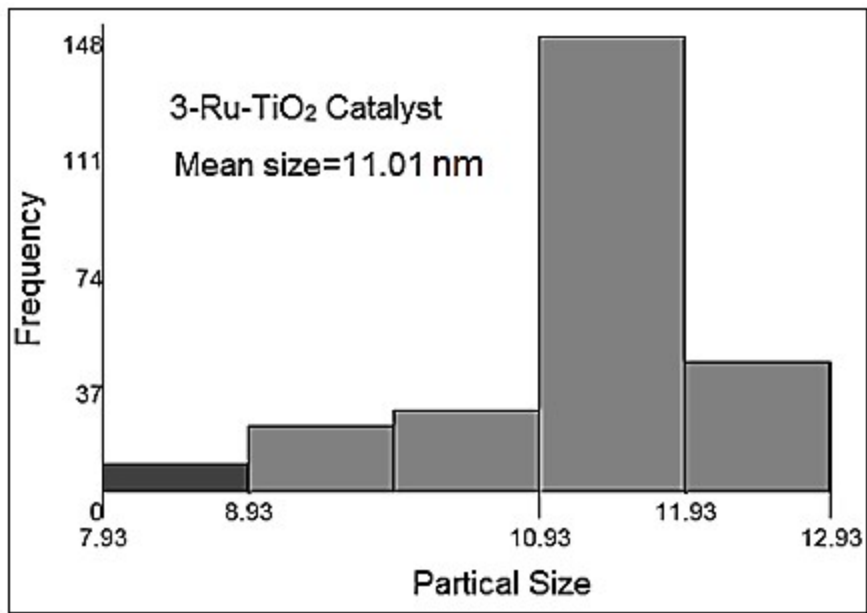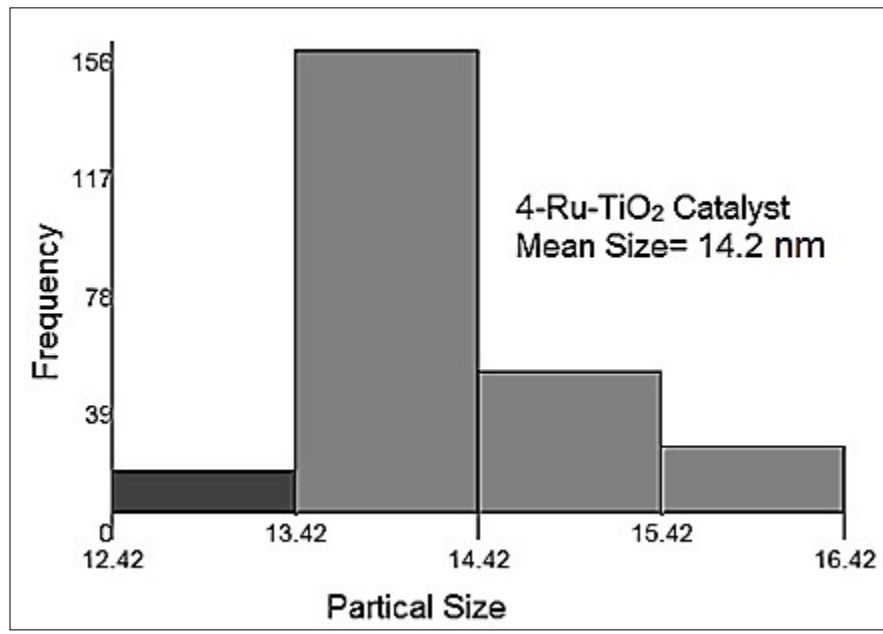

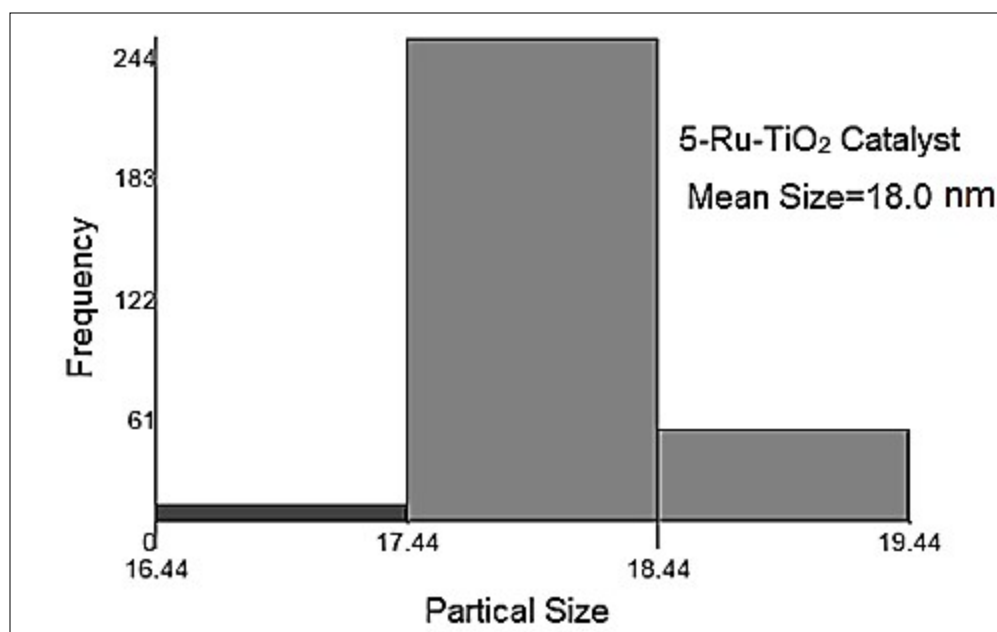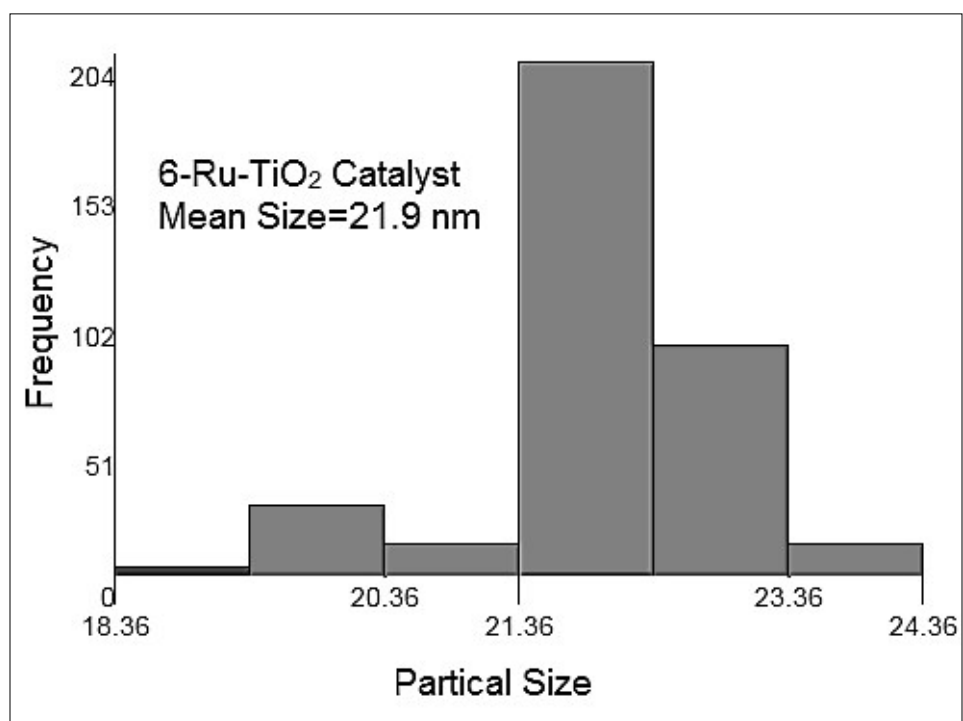

Supplement: c6ra03660k1.pdf [file c6ra03660k1.pdf]
